# Supplementary material
Source: PubMed Central journal article supplement (PMC4933601)
Supplement: supp_4.2.E240_2015-0087-1-at.pdf [file supp_4.2.E240_2015-0087-1-at.pdf]

**Appendix 1 (as supplied by the authors): Reasons for emergency department visit (visits per 1000 person-years)**

|                                  | <b>Rate (95% confidence interval) in persons with HIV</b> | <b>Rate (95% confidence interval) in HIV-negative individuals</b> | <b>Rate ratio (95% confidence interval)</b> |
|----------------------------------|-----------------------------------------------------------|-------------------------------------------------------------------|---------------------------------------------|
| Infectious diseases              | 87.27 (82.50 to 92.23)                                    | 21.55 (20.37 to 22.78)                                            | 4.05 (3.74 to 4.38)                         |
| Injuries/trauma                  | 86.01 (81.28 to 90.94)                                    | 59.47 (57.50 to 61.50)                                            | 1.45 (1.36 to 1.54)                         |
| Mental health illness            | 62.21 (58.20 to 66.43)                                    | 19.73 (18.60 to 20.91)                                            | 3.15 (2.89 to 3.44)                         |
| Respiratory                      | 51.29 (47.65 to 55.13)                                    | 20.06 (18.92 to 21.25)                                            | 1.97 (1.66 to 2.33)                         |
| Musculoskeletal                  | 42.10 (38.81 to 45.59)                                    | 26.11 (24.81 to 27.47)                                            | 1.61 (1.47 to 1.77)                         |
| Digestive, including oral cavity | 41.34 (38.08 to 44.80)                                    | 20.32 (19.17 to 21.52)                                            | 2.03 (1.84 to 2.25)                         |
| Genitourinary/renal              | 20.39 (18.12 to 22.86)                                    | 10.80 (9.97 to 11.68)                                             | 1.89 (1.64 to 2.17)                         |
| Circulatory system               | 19.62 (17.40 to 22.05)                                    | 13.39 (12.46 to 14.36)                                            | 1.47 (1.28 to 1.68)                         |
| Neurologic                       | 12.11 (10.38 to 14.05)                                    | 5.17 (4.60 to 5.79)                                               | 2.34 (1.94 to 2.83)                         |
